# Supplementary material for: Effects of different doses of granulocyte colony-stimulating factor mobilization therapy on ischemic cardiomyopathy
Source: PubMed Central journal article supplement (PMC5897440; doi:10.1038/s41598-018-24020-y), 2018-04-12
Supplement: 41598_2018_24020_MOESM1_ESM.pdf [file 41598_2018_24020_MOESM1_ESM.pdf]

# **Effects of different doses of granulocyte colony-stimulating factor mobilization therapy on ischemic cardiomyopathy**

Rongchong Huang, Haichen Lv, Kang Yao, Lei Ge, Zhishuai Ye, Huaiyu Ding, Yiqi Zhang, Hao Lu, Zheyong Huang, Shuning Zhang, Yunzeng Zou, Junbo Ge

**Supplementary Figure S1** Serum concentration of G-CSF after mobilization in each group

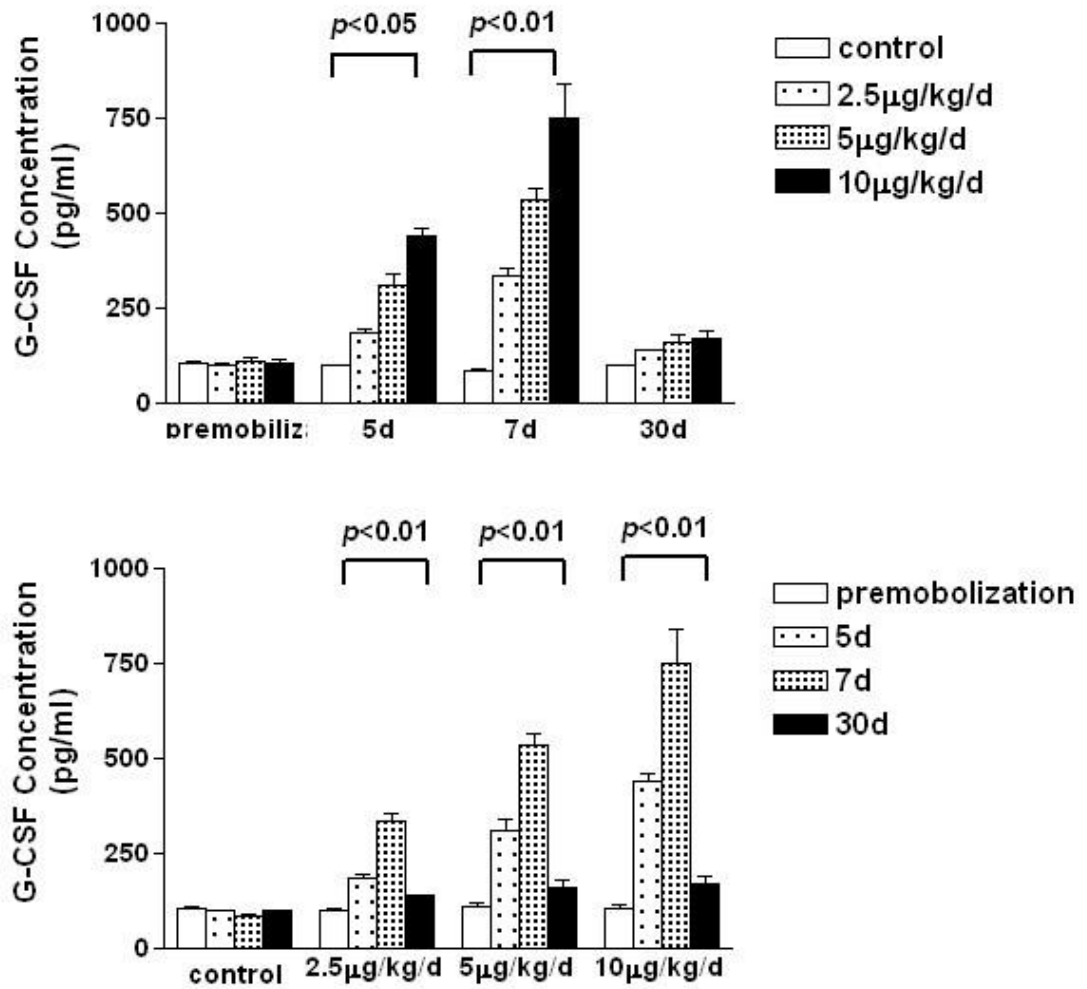

Supplementary Figure S2 Flow cytometry with CD45/PE gating

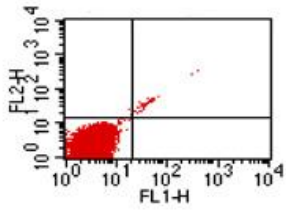

| Quad | Events | % Gated | % Total | X Geo Mean |
|------|--------|---------|---------|------------|
| UL   | 9      | 0.08    | 0.08    | 17.43      |
| UR   | 102    | 0.90    | 0.88    | 39.22      |
| LL   | 11221  | 99.01   | 96.52   | 3.85       |
| LR   | 1      | 0.01    | 0.01    | 21.87      |

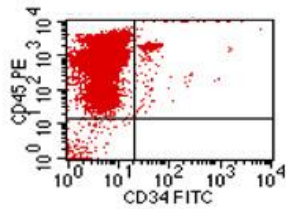

| Quad | Events | % Gated | % Total | X Geo Mean |
|------|--------|---------|---------|------------|
| UL   | 48654  | 98.33   | 97.31   | 5.81       |
| UR   | 470    | 0.95    | 0.94    | 56.05      |
| LL   | 355    | 0.72    | 0.71    | 1.80       |
| LR   | 2      | 0.00    | 0.00    | 24.47      |

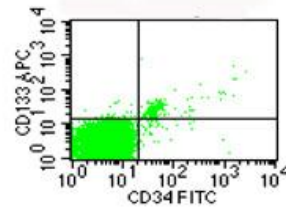

| Quad | Events | % Gated | % Total | X Geo Mean |
|------|--------|---------|---------|------------|
| UL   | 88     | 0.18    | 0.18    | 7.12       |
| UR   | 384    | 0.77    | 0.77    | 59.37      |
| LL   | 49097  | 98.85   | 98.19   | 5.75       |
| LR   | 100    | 0.20    | 0.20    | 45.36      |

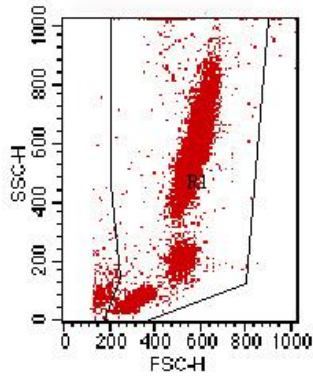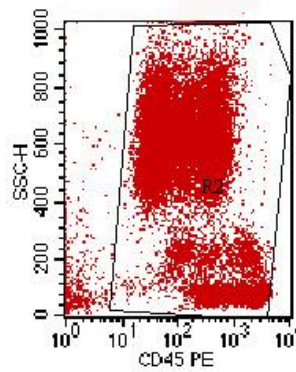

**Supplementary Figure S3** Expression of CD34 and CD34/CD133 in each group at the 7th day after G-CSF mobilization

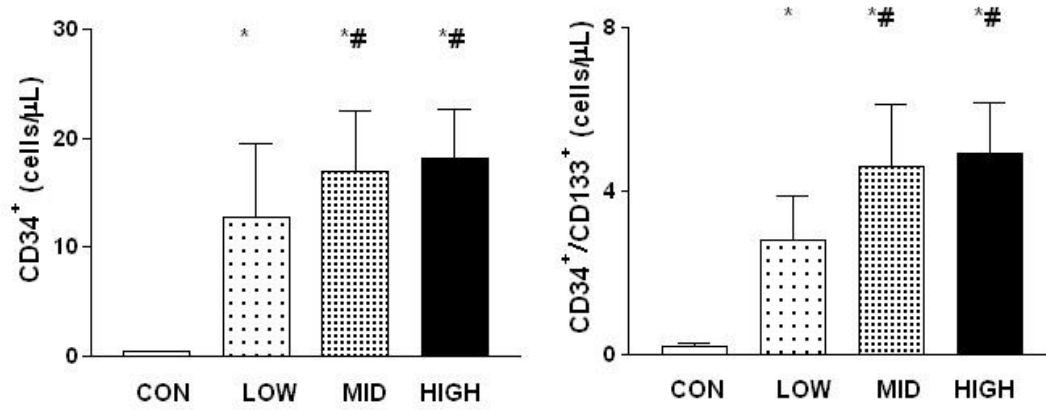

CON, control; LOW, low dose group; MID, middle dose group; HIGH, high dose group; \*, p<0.05 compared with control group; #, p<0.05 compared with low dose group

**Supplementary Figure S4-1** Myocardial perfusion imaging measured by  $^{99m}\text{Tc}$ -MIBI-SPECT in moderate dose group

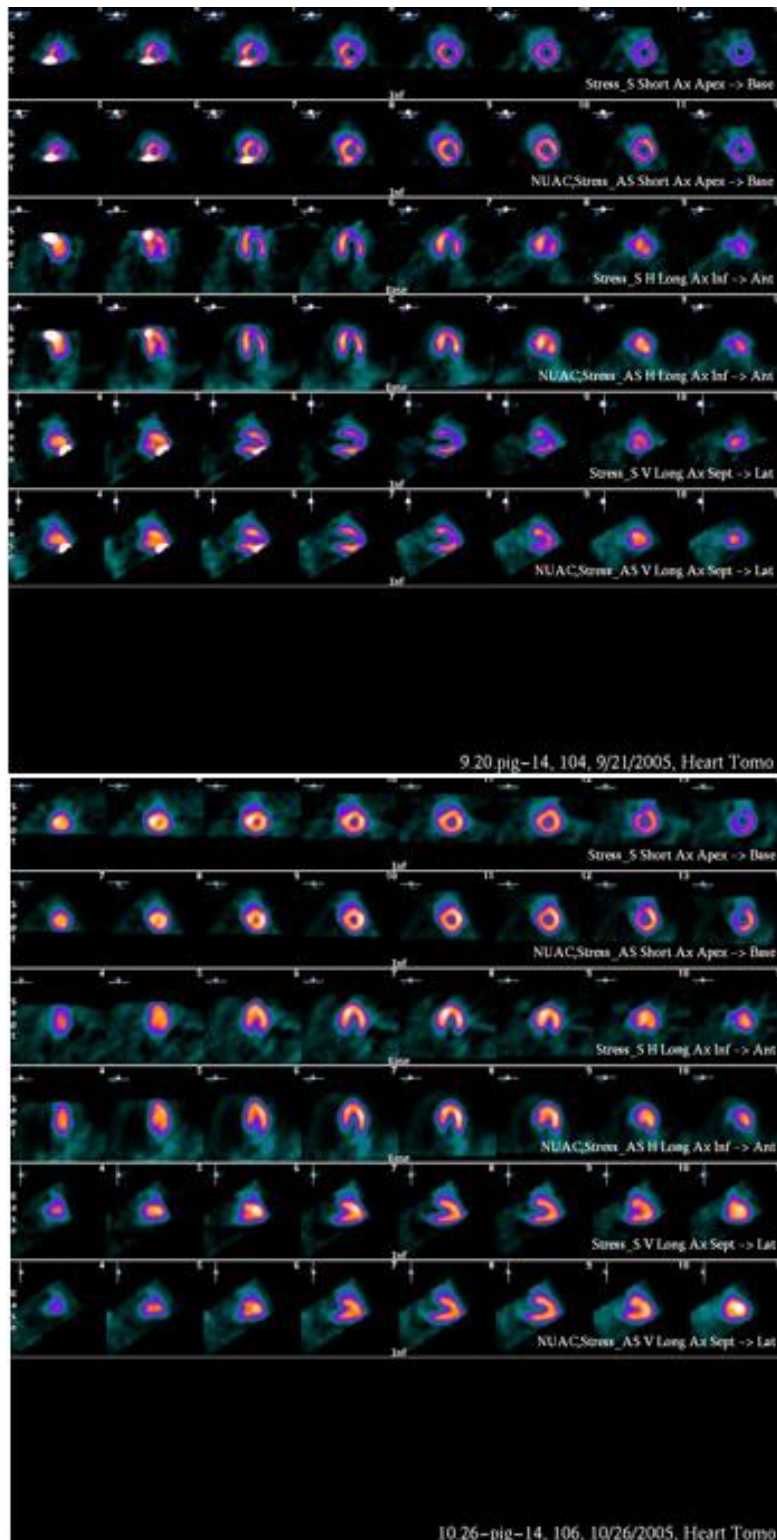

Image above, 4 weeks after modeling; Image below, 8 weeks after modeling.

Supplementary Figure S4-2 Bull's eye plot measured by  $^{99m}\text{Tc}$ -MIBI-SPECT in moderate dose group

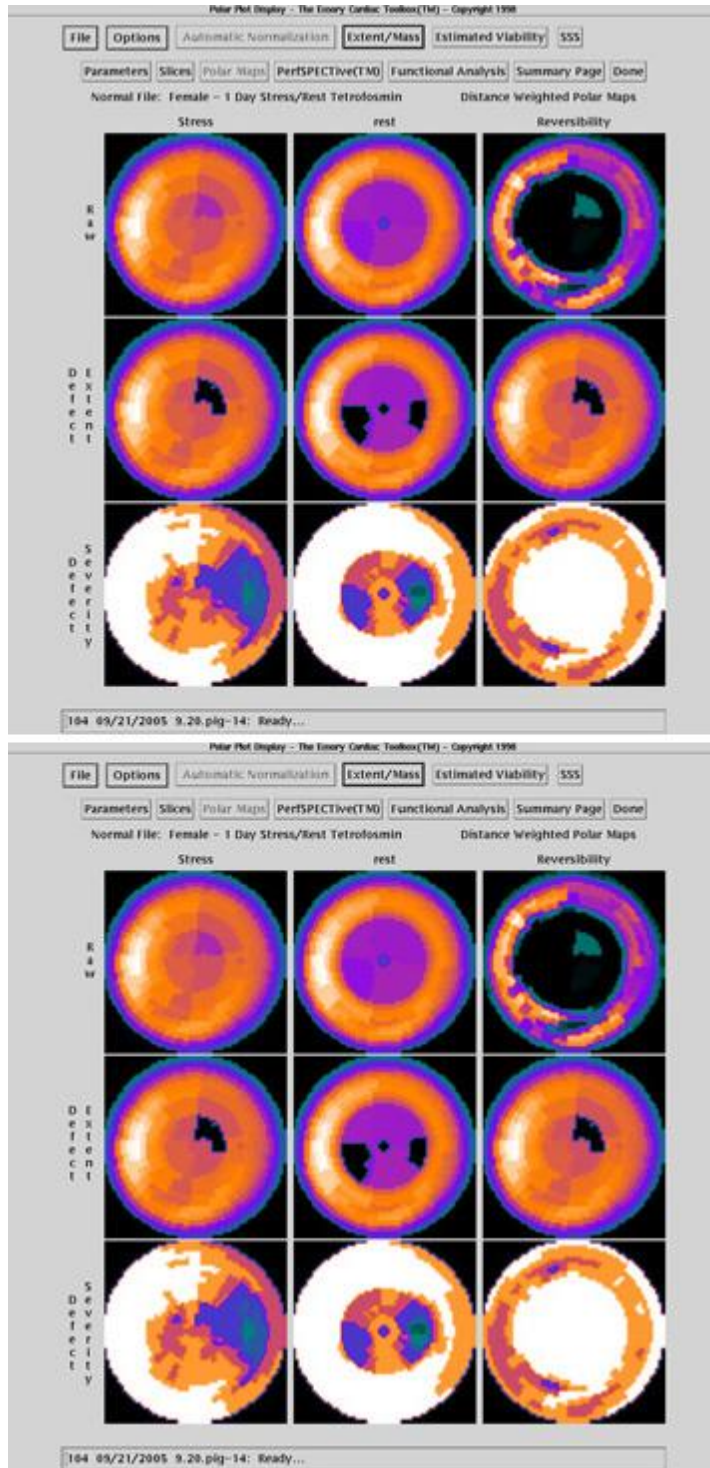

Image above, 4 weeks after modeling; Image, below, 8 weeks after modeling.

**Supplementary Figure S5** Expression of Akt in infarction border zone measured by western blot, 8 weeks after modeling

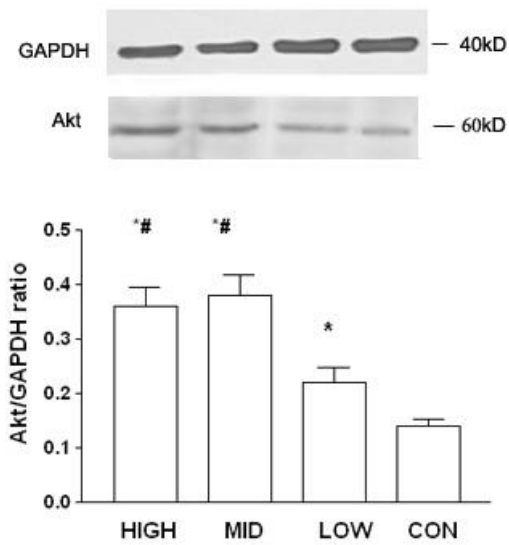

CON, control; LOW, low dose group; MID, middle dose group; HIGH, high dose group.

\*,  $p < 0.05$  compared with control group; #,  $p < 0.05$  compared with low dose group;

$\Delta$ ,  $p < 0.05$  compared with high dose group.

**Supplementary Figure S6** Expression of S-100 surrounding coronary artery, 8 weeks after modeling (immunohistochemical staining, 200×)

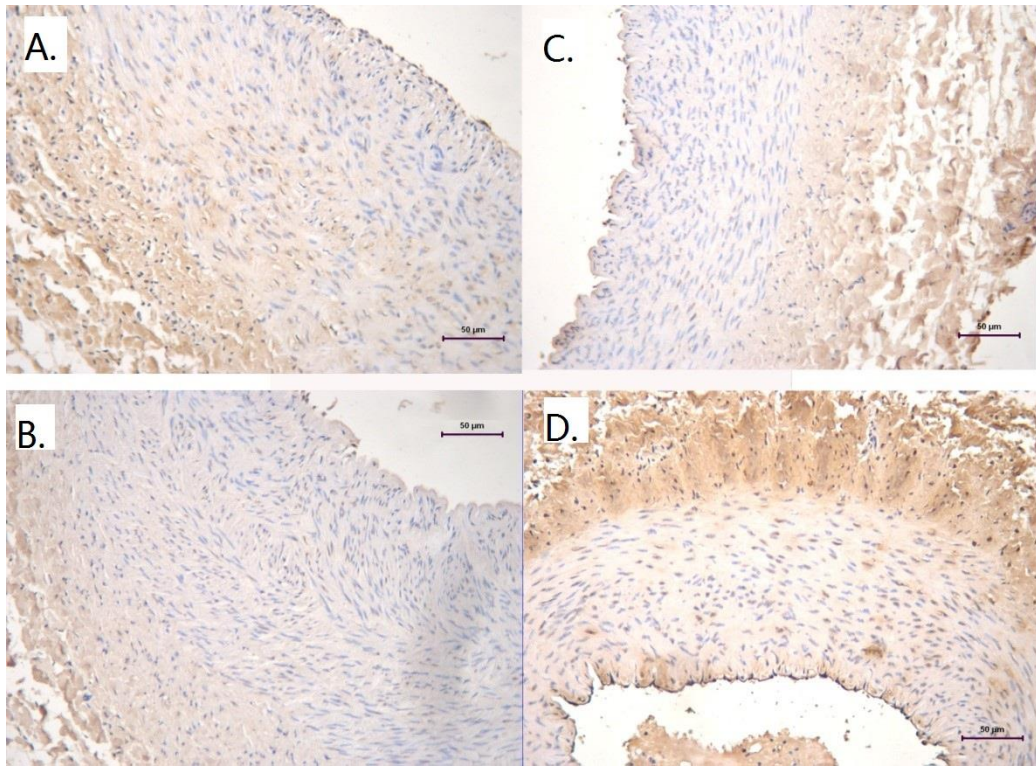

A. Control group, B. Low dose group, C. Middle dose group, D. High dose group.



**Supplementary Figure S7** Expression of PPAR- $\alpha$  surrounding coronary artery

measured by western blot, 8 weeks after modeling

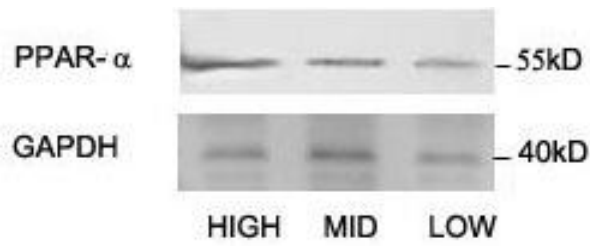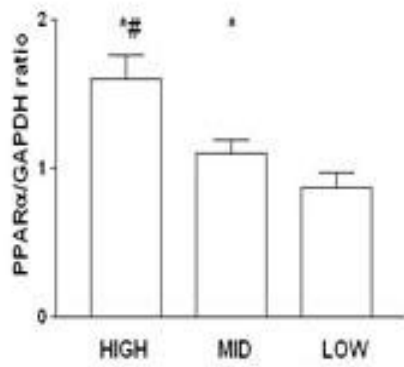

LOW, low dose group; MID, middle dose group; HIGH, high dose group.

\*,  $p < 0.05$  compared with low dose group; #,  $p < 0.05$  compared with middle dose group.
